# Supplementary material for: Water-Saving Potential of Different Agricultural Management Practices in an Arid River Basin
Source: MDPI journal article supplement (doi:10.3390/w14132072), 2022-06-29
Supplement: s1 [file s1]

# Water-saving potential of different agricultural management practices in an arid river basin

Wang Zhang<sup>1,2</sup>, Yong Tian<sup>2</sup>, Yu Feng<sup>2</sup>, Jie Liu<sup>1\*</sup>, Chunmiao Zheng<sup>1, 2</sup>

<sup>1</sup>Institute of Water Sciences, College of Engineering, Peking University, Beijing, China

<sup>2</sup>State Environmental Protection Key Laboratory of Integrated Surface Water-Groundwater Pollution Control, School of Environmental Science and Engineering, Southern University of Science and Technology, Shenzhen, China

Supplementary Material

## A. Estimation of soil hydraulic parameters

Three soil hydraulic parameters ( $\theta_s$ ,  $\theta_{fc}$ ,  $\theta_{wp}$ ) in each simulated unit were calculated as follows [1,2]:

$$\theta_s = -0.00126F_{sand} + 0.489 \quad (1)$$

$$\psi_s = -7.74e^{-0.0302F_{sand}} \quad (2)$$

$$b = 0.159F_{clay} + 2.91 \quad (3)$$

$$\theta_{fc} = \theta_s \left( \psi_{fc} / \psi_s \right)^{-1/b} \quad (4)$$

$$\theta_{wp} = \theta_s \left( \psi_{wp} / \psi_s \right)^{-1/b} \quad (5)$$

where  $F_{sand}$  and  $F_{clay}$  are the percentages of soil sand and clay (%),  $\psi_s$ ,  $\psi_{fc}$ , and  $\psi_{wp}$  represent the soil matric potential at saturation, field capacity and permanent wilting points, respectively (kPa), and  $b$  is the Campbell slope.  $K_s$  was estimated by the ROSETTA program, and the curve number (CN) was determined by the saturated conductivity of the topsoil.

## References

1. Campbell, G.S. A simple method for determining unsaturated conductivity from moisture retention data. *Soil science* **1974**, *117*, 311-314.
2. Koren, V.; Smith, M.; Duan, Q. Use of a priori parameter estimates in the derivation of spatially. *Calibration of watershed models* **2003**, 239.

**Figure S1. Comparison between the observed and simulated (a) soil water content, (b) crop canopy cover, (c) aboveground biomass and (d) yield at the three experimental stations during the validation period.**

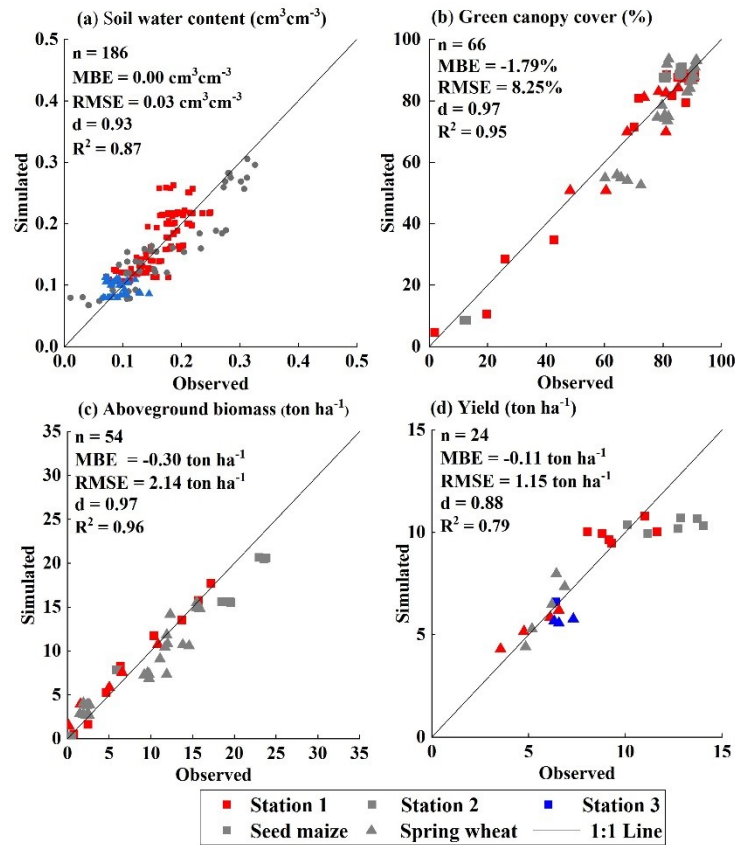

**Table S1. Full list of calibrated crop parameters at three experimental stations.**

| No | Name    | Description                                                                  | Spring wheat  |      |      |      | Seed maize    |      |      |      |
|----|---------|------------------------------------------------------------------------------|---------------|------|------|------|---------------|------|------|------|
|    |         |                                                                              | Initial value | GZ   | LZ   | GT   | Initial value | GZ   | LZ   | GT   |
| 1  | Tbase   | Base temperature                                                             | 0             | 0    | 0    | 0    | 8             | 8    | 8    | 8    |
| 2  | Tupper  | Upper temperature                                                            | 26            | 26   | 26   | 26   | 30            | 30   | 30   | 30   |
| 3  | pexu    | Soil water depletion threshold for canopy expansion - Upper threshold        | 0.2           | 0.2  | 0.2  | 0.2  | 0.14          | 0.14 | 0.14 | 0.14 |
| 4  | pexl    | Soil water depletion threshold for canopy expansion - Lower threshold        | 0.65          | 0.65 | 0.65 | 0.65 | 0.72          | 0.72 | 0.72 | 0.72 |
| 5  | pexshp  | Shape factor for Water stress coefficient for canopy expansion               | 5             | 5    | 5    | 5    | 2.9           | 2.9  | 2.9  | 2.9  |
| 6  | psto    | Soil water depletion threshold for stomatal control – Upper threshold        | 0.65          | 0.65 | 0.65 | 0.65 | 0.69          | 0.69 | 0.69 | 0.69 |
| 7  | pstoshp | Shape factor for Water stress coefficient for stomatal control               | 2.5           | 2.5  | 2.5  | 2.5  | 6             | 6    | 6    | 6    |
| 8  | psen    | Soil water depletion threshold for canopy senescence –Upper threshold        | 0.7           | 0.7  | 0.7  | 0.7  | 0.69          | 0.69 | 0.69 | 0.69 |
| 9  | psenshp | Shape factor for Water stress coefficient for canopy senescence              | 2.5           | 2.5  | 2.5  | 2.5  | 2.7           | 2.7  | 2.7  | 2.7  |
| 10 | ppol    | Soil water depletion threshold for failure of pollination –Upper threshold   | 0.85          | 0.85 | 0.85 | 0.85 | 0.8           | 0.8  | 0.8  | 0.8  |
| 11 | anaer   | Vol% at anaerobiotic point                                                   | 5             | 5    | 5    | 5    | 5             | 5    | 5    | 5    |
| 12 | poln    | Minimum air temperature below which pollination starts to fail (cold stress) | 5             | 5    | 5    | 5    | 10            | 10   | 10   | 10   |
| 13 | polx    | Maximum air temperature above which pollination starts to fail (heat stress) | 35            | 35   | 35   | 35   | 40            | 40   | 40   | 40   |

|    |        |                                                                              |               |        |        |        |               |       |       |       |
|----|--------|------------------------------------------------------------------------------|---------------|--------|--------|--------|---------------|-------|-------|-------|
| 14 | stbio  | Minimum growing degrees required for full biomass production                 | 13.0-15.0     | 14     | 14     | 14     | 12            | 12    | 12    | 12    |
| 15 | ecen   | Electrical conductivity of the saturated soil-paste extract: lower threshold | 6             | 6      | 6      | 6      | 1             | 1     | 1     | 1     |
| 16 | ecex   | Electrical conductivity of the saturated soil-paste extract: upper threshold | 20.1          | 20     | 20     | 20     | 10            | 10    | 10    | 10    |
| 17 | Kctrx  | Crop coefficient when canopy is complete but prior to senescence             | 1.1           | 1.1    | 1.1    | 1.1    | 1.05          | 1.05  | 1     | 1.05  |
| 18 | fage   | Decline of crop coefficient                                                  | 0.15          | 0.15   | 0.15   | 0.15   | 0.3           | 0.15  | 0.3   | 0.3   |
| 19 | Zn     | Minimum effective rooting depth                                              | 0.3           | 0.3    | 0.3    | 0.3    | 0.3           | 0.3   | 0.3   | 0.3   |
| 20 | Zx     | Maximum effective rooting depth                                              | Up to 2.4     | 1.34   | 1.5    | 1.4    | 1.6           | 1.6   | 1.6   | 1.6   |
| 21 | Rtshp  | Shape factor describing root zone expansion                                  | 15            | 15     | 15     | 15     | 13            | 13    | 13    | 13    |
| 22 | Sxtop  | Maximum root water extraction in top quarter of root zone                    | 0.044         | 0.044  | 0.044  | 0.044  | 0.015         | 0.015 | 0.015 | 0.015 |
| 23 | Sxbot  | Maximum root water extraction in bottom quarter of root zone                 | 0.012         | 0.012  | 0.012  | 0.012  | 0.004         | 0.004 | 0.004 | 0.004 |
| 24 | evladc | Effect of canopy cover in reducing soil evaporation in late season stage     | 50            | 50     | 50     | 50     | 50            | 50    | 50    | 50    |
| 25 | cco    | Canopy size of the average seedling at 90% emergence                         | 1.5           | 1.5    | 1.5    | 1.5    | 6.5           | 6.5   | 6.5   | 6.5   |
| 26 | den    | Number of plants per hectare                                                 | 200000-700000 | 545000 | 600000 | 600000 | 50000-1000000 | 75000 | 98000 | 75000 |
| 27 | CGC    | Canopy growth coefficient                                                    | 5%-7%         | 8.50%  | 8%     | 8%     | 12-13%        | 12%   | 12%   | 12%   |
| 28 | CCx    | Maximum canopy cover                                                         | 80-99%        | 96%    | 98%    | 95%    | 97%           | 94%   | 93%   | 89%   |
| 29 | CDC    | Canopy decline coefficient                                                   | 4%            | 4%     | 4.50%  | 4%     | 10%           | 10%   | 10%   | 10%   |
| 30 | eme    | Time from sowing to emergence                                                | 14            | 20     | 9      | 20     | 21            | 21    | 21    | 21    |
| 31 | root   | Time from sowing to maximum rooting depth                                    | 85            | 80     | 75     | 85     | 134           | 130   | 139   | 145   |
| 32 | sen    | Time from sowing to start senescence                                         | 100           | 100    | 90     | 98     | 134           | 128   | 134   | 135   |
| 33 | mat    | Time from sowing to maturity                                                 | 121           | 121    | 116    | 124    | 149           | 149   | 150   | 154   |
| 34 | flo    | Time from sowing to flowering or to the start of yield                       | 81            | 83     | 66     | 80     | 97            | 88    | 94    | 95    |

|    |        |                                                                                                     |       |      |     |      |       |      |      |      |
|----|--------|-----------------------------------------------------------------------------------------------------|-------|------|-----|------|-------|------|------|------|
| 35 | flolen | Length of the flowering stage                                                                       | 5     | 14   | 5   | 8    | 10    | 8    | 8    | 8    |
| 36 | exc    | Excess of potential fruits                                                                          | 100   | 100  | 100 | 100  | 50    | 50   | 50   | 50   |
| 37 | hilen  | Building up of harvest index starting at flowering                                                  | 38    | 31   | 23  | 30   | 75    | 30   | 40   | 30   |
| 38 | wp*    | Water productivity normalized for ET <sub>o</sub> and CO <sup>2</sup>                               | 15    | 16.5 | 20  | 17.5 | 33.7  | 33.7 | 33.7 | 33.7 |
| 39 | Hio    | Reference harvest index                                                                             | 45-50 | 50   | 45  | 48   | 48-52 | 44   | 41   | 43   |
| 40 | hiflo  | Possible increase (%) of HI due to water stress before flowering                                    | 5     | 5    | 4   | 5    | 0     | 0    | 0    | 0    |
| 41 | hipi   | Coefficient describing positive impact of restricted vegetative growth during yield formation on HI | 10    | 10   | 10  | 4    | 10    | 10   | 10   | 10   |
| 42 | hini   | Coefficient describing negative impact of stomatal closure during yield formation on HI             | 5     | 5    | 5   | 7    | 3     | 3    | 3    | 3    |
| 43 | hia    | Allowable maximum increase (%) of specified HI                                                      | 15    | 15   | 15  | 15   | 15    | 15   | 15   | 15   |

*Note:* GZ, LZ and GT represent experimental sites at Ganzhou, Linze and Gaotai County, respectively. wp\* is the normalized water productivity.

**Table S2. Uncertainty analysis results of simulated crop yields.**

| Station   | Seed maize |      | Spring wheat |      |
|-----------|------------|------|--------------|------|
|           | SD         | CV   | SD           | CV   |
| Station 1 | 1.91       | 0.26 | 1.86         | 0.22 |
| Station 2 | 1.51       | 0.21 | 1.49         | 0.17 |
| Station 3 | 1.01       | 0.12 | 1.27         | 0.15 |

*Note:* SD (ton ha<sup>-1</sup>) and CV represent the standard deviation and coefficient of variation of the simulated crop yields.
